# Supplementary material for: Redox Modifications of Proteins of the Mitochondrial Fusion and Fission Machinery
Source: PubMed Central journal article supplement (PMC7226787; doi:10.3390/cells9040815), 2020-03-27
Supplement: cells-09-00815-s001.pdf [file cells-09-00815-s001.pdf]

|                             |                                             |            |                    |                   |             |
|-----------------------------|---------------------------------------------|------------|--------------------|-------------------|-------------|
| MARF <i>D. melanogaster</i> | TLQARIEEAKGNPPHMGAI AEGFQIRYFEFQDFERKFEE    | CI         | SQSAVTKTKFQQHSSRGK | SV                | 408         |
| FZ01 <i>C. elegans</i>      | VLESRLKAR-GLVQ-KAYQAEHGTRALEFQNFERHFEH      | CI         | SRSAIHTKFEAHNRAH   | EM                | 378         |
|                             | .*:.*.                                      | ***. *     | ***:**. *          | ***:**.***: *     | ..:..       |
| MFN1 <i>H. sapiens</i>      | LATVKNIMDSVNLAAEDKRHYSVEEREDQIDRLDFIRNQMNL  | LL         | LDVKKKIK           | VEE               | 407         |
| MFN1 <i>M. musculus</i>     | LDTVKNILDSVNVAAAEKRVYSMEEREDQIDRLDFIRNQMNL  | LL         | LDVKKKIK           | VEE               | 407         |
| MFN1 <i>G. gallus</i>       | IDTVKNIMDAINVAAAEKRVLSMEEREDQKDRLDFVRNQLN   | IL         | EDTKEKIK           | RV                | 408         |
| MFN1 <i>D. rerio</i>        | TETVKDIMDQINITAAEKRVVLSLEEREYLIDRLDFVRNQLN  | LI         | QDIKKIK            | KA                | 403         |
| MARF <i>D. melanogaster</i> | SGDMKSMLDNIYERITIFRNKQDQKNLLTERIQGTETQMMQV  | TRE        | MKMIHNM            | VEE               | 468         |
| FZ01 <i>C. elegans</i>      | IGKMRNLNLSVLTSAAEQRSKLNQNNLNESRTRFNECRVNF   | TQ         | FEKAYRE            | TEQ               | 438         |
|                             | :: :: :                                     | *          | :: :               | :: . :: .         | :: : . : ** |
| MFN1 <i>H. sapiens</i>      | KVSCAMTDEICRLSVLVDFEFCSEFHPNPVVKIYKSELNKH   | IED        | GMGRNLADR          | CTDE              | 467         |
| MFN1 <i>M. musculus</i>     | KVSCAMTDEICRLSVLVDFEFCSEFHPTPSVLKVKYKSELNKH | IED        | GMGRNLADR          | CTNE              | 467         |
| MFN1 <i>G. gallus</i>       | KVSSAMTDEICRLSVLVDFEYSDFHSPQVLKLYKTELNKH    | IED        | GLGKNLADR          | CSSE              | 468         |
| MFN1 <i>D. rerio</i>        | KVSNAMAEIICRLSVIIDEFRSDFHSPQMLKMYKSDLLSH    | IE         | QGMGKNLAF          | RCSDA             | 463         |
| MARF <i>D. melanogaster</i> | KVSKALNEEIWRGLVLIDEFNMPFPERVLVNIYKKELN      | NAH        | VESGLG             | SNLRARL           | 528         |
| FZ01 <i>C. elegans</i>      | KVSADFFEEIARLDAIIDRFQDFGSSSGMTKYKEDLAI      | FV         | DKLSSD             | LEARCT            | 498         |
|                             | *** : ** *                                  | ..:.*      | ..:.*              | ..:.*             | ..:.*       |
| MFN1 <i>H. sapiens</i>      | LVLQTQQEIIENLKPLLPAGI--QDKLHTLI-PCKKFDLS    | YNL        | NHKLCS             | DFQED             | 524         |
| MFN1 <i>M. musculus</i>     | SILQSQQEIIENLKPLLPAGI--QNKLHTLI-PCKKFDLS    | YDL        | NCHKLCS            | DFQED             | 524         |
| MFN1 <i>G. gallus</i>       | SMHQSQQEIIENLKPLLPAGI--QNQLHLI-PCRKFDLS     | YDL        | NCHSLC             | ADFD              | 525         |
| MFN1 <i>D. rerio</i>        | SVQCSQQDMIECLKPLPSAA--QTQLHMLI-PSRKFE       | LS         | YDLN               | CATLCS            | 520         |
| MARF <i>D. melanogaster</i> | NVESAQTEMTDRMHALVNEQLLATSTKMVV-RTQPFEM      | LY         | SLNC               | QNLCA             | 587         |
| FZ01 <i>C. elegans</i>      | RIWNLENDMFQYVTKILAEPY--QNKLEEVWRYRAPFK      | FS         | CVDV               | PALVND            | 556         |
|                             | : : : : : :                                 | . . :      | *.:                | :: *              | ***:**. **  |
| MFN1 <i>H. sapiens</i>      | SLGWSSLVHRFLGPRNAQRVLLGL--SEPIFQLPRSLAS     | TPTAPT     | -----              | ATPD              | 573         |
| MFN1 <i>M. musculus</i>     | SLGWSSLVHRFLGSTNAQRVLLGL--SEPIFQVPRSLAS     | TPTAP      | SNP-----           | AAPD              | 573         |
| MFN1 <i>G. gallus</i>       | SLGWTSLVNRFLGPKHAQRVLLGL--ADPNLQIPRPLAT     | TPSA       | ALP-----           | AATPE             | 575         |
| MFN1 <i>D. rerio</i>        | SLGWSALVHRFLGFPVNAKRALMLV---DQNLQLTAPT      | --TP       | APAVVQ             | SQNSRAL           | 575         |
| MARF <i>D. melanogaster</i> | SWGIAAMIRQFTGKVRERSKKQOPALVNRQSSIGHSV       | -STPT      | TPV                | EATPV             | 646         |
| FZ01 <i>C. elegans</i>      | TFGLHAIIRRIIAYRSQGPVTAI---NTNLLTPLSLKQ      | Q-----     | SEKNS              | VRD               | 605         |
|                             | : * :::**. :                                | :          | :                  | :                 | :           |
| MFN1 <i>H. sapiens</i>      | NASQEELMITLVTGLASVTSRT                      | SMGI       | IIVGGV             | IWKTIG            | 633         |
| MFN1 <i>M. musculus</i>     | NAAQEELMITLITGLASLTSRT                      | SMGI       | IIVGGV             | IWKTIG            | 633         |
| MFN1 <i>G. gallus</i>       | NTSPDDFMVPLVMSLASLTSRT                      | SMSI       | IIVGGV             | IWKTIG            | 635         |
| MFN1 <i>D. rerio</i>        | SVTQEELMLTMVNNLASVTSRT                      | SMSV       | IIVGGV             | VWRTIG            | 635         |
| MARF <i>D. melanogaster</i> | GITPEQLSLISRFVSSIGSQG                       | TVGG       | LVVAG              | VMLKTI            | 706         |
| FZ01 <i>C. elegans</i>      | ASEEQAMMTQMVLTSAAFLANG                      | SLG        | LVVGGI             | VYKAVG            | 765         |
|                             | : :                                         | :: . . ::: | :::**.***:         | :::**.***:        | : * . * **: |
| MFN1 <i>H. sapiens</i>      | TTHAKERAFKQQFVNYATEKLRMIVSSTSANC            | SHQV       | QQ                 | IATTF             | 693         |
| MFN1 <i>M. musculus</i>     | TTRAKERAFKQQFVNYATEKLMIVSFTSANC             | SHQV       | QQEM               | MATTF             | 693         |
| MFN1 <i>G. gallus</i>       | TTKAKERAFKQQFVNYATEKLMIVSLSANC              | SHQV       | QQEM               | MATTF             | 695         |
| MFN1 <i>D. rerio</i>        | TTKAKERALKKQFVDYATEKLMIVSFTSANC             | SHQV       | QQEM               | IATTF             | 695         |
| MARF <i>D. melanogaster</i> | TNSAKERTFKSQYVRHATKKLKMIVDLTSANC            | SHQV       | QQLS               | STF               | 766         |
| FZ01 <i>C. elegans</i>      | NSGAKEQHLKEQFRSHLAARMQQVSTAHTHCH            | ETQA       | IRE                | MDQV              | 725         |
|                             | .. ***: .*. *:                              | : : :::    | : : * . . :::      | : * . * . . . . . | ..:..       |
| MFN1 <i>H. sapiens</i>      | EIARLPKEIDQLEKIQNNSKLLRNKAVQLENELE          | N          | FTKQ               | FLPSS             | 741         |
| MFN1 <i>M. musculus</i>     | EIARLSKEIDQLEKIQNNSKLLRNKAVQLESELE          | N          | FSKQ               | FLPSS             | 741         |
| MFN1 <i>G. gallus</i>       | EIARLSKEIDQLENIQSHSKQLRNKAIHLENE            | L          | DHFT               | KHFLQ             | 740         |
| MFN1 <i>D. rerio</i>        | DIQRLTDKIQKLETVQNRSKVLRHKATALEM             | Q          | LEDF               | SSQY              | 740         |
| MARF <i>D. melanogaster</i> | ELKTLDSQLNILEANQKQLKLLRNKANYIQNE            | L          | DI                 | FEHNY             | 810         |
| FZ01 <i>C. elegans</i>      | DLDVQKTQIDAVDSTIRTLGTIKGKAVFLLRN            | LEQ        | FASSY              | LRSDS             | 774         |
|                             | :: :: : :                                   | :: ** :    | ::*:               | :: :              | .           |

## Alignment MFN2

█ Conserved cysteine residues  
█ GTPase domain  
█ HR1  
█ HR2  
█ TMD

|                             |                                                                |    |
|-----------------------------|----------------------------------------------------------------|----|
| MFN2 <i>H. sapiens</i>      | -----MS-----LLFSRCNSIVTVKK                                     | 16 |
| MFN2 <i>M. musculus</i>     | -----MS-----LLFSRCNSIVTVKK                                     | 16 |
| MFN2 <i>G. gallus</i>       | -----VGDEAQPSPRQSS-----LL---ILGFFTLKK                          | 23 |
| MFN2 <i>D. rerio</i>        | -----MS-----LVFPRPNTSVIGKK                                     | 16 |
| MARF <i>D. melanogaster</i> | MAAYLNRTISMVGTQGTGFADDDRHASSTDTVDKSGPGSPLSRFNSSLQSQSGSTMAANLLP | 60 |
| FZ01 <i>C. elegans</i>      | -----MSGTAS-----LVHTLPASGDSNHRGLHS                             | 24 |

\*







```

Fisl M. musculus      KSTQFEYAWCLVRSKYNE DIRRGIVLLEELL PKGS-KEEQRDYVFYLAVGNRYRLKEYEKA 90
Fisl G. gallus       RRCRFYAWGLLRSRYNSDVRKGVAMFRELMDAGA-PEEQRDVYVYLAVGNRYRLKEYEQA 118
Fisl D. rerio        RDTTFEYAWCLIRSKYTNDIVKGIQLLEELVHTSK-KDDQDRDFLYLAVANYRLKEYERA 90
Fisl D. melanogaster TDTKFEYAFCLVRSRYTNDVVRKGMILEELART-H-PDGRRDYIYLAFGNARIKEYTSG 90
Fisl C. elegans      AASTFAFAHAMIGSKNKLVDKEGIVCLEKLLRDEDEDRTSKRNYVYLAVAHARIKQYDLA 93

```

```

* : * : : * : . * : . * : : : * : : * : : * * * : : * : * : .

```

```

Fisl H. sapiens      LKYVRGLLQTEPQNNQAKELERLIDKAMKKDGLVGM AIVGGMALGVAGLAGLI GLAVSKS 150
Fisl M. musculus     LKYVRGLLQTEPQNNQAKELERLIDKAMKKDGLVGM AIVGGMALGVAGLAGLI GLAVSKS 150
Fisl G. gallus       LKYV GALLQAEFGNTQGLRLQQLVRCMHRGEPHCAP----- 155
Fisl D. rerio        LKYIRTL LKNEPDKNQALELEKLIKDALKKDGLVGM AIVGGIGLVAGLAGLI GLAVSKG 150
Fisl D. melanogaster LKYCRAFLDIES-NDQVRSLEEYIKKEIDKEVAKGMV VAGGAALVGGILGL-GIAMARN 148
Fisl C. elegans      LGYIDVLLDAEGDNQQAATLKSISKSAMTHDGLIGAAIVGGGALALAGLV AIFSMSRK-- 151

```

```

* * : * . * * * * * : . : : : :

```

```

Fisl H. sapiens      KS---- 152
Fisl M. musculus     KS---- 152
Fisl G. gallus       -----
Fisl D. rerio        AKS--- 153
Fisl D. melanogaster KQKREK 154
Fisl C. elegans      -----

```

### Alignment MFF

■ Repeated domains  
■ Coiled coil domain  
■ TMD

```

MFF H. sapiens      MSKGTSSDSTSLGRVSRAAFPSPTAAEMAEISRIQYEM EYTEGISQRMRVPEKLVKVAEPNA 60
MFF M. musculus     -----MAEISRIQYEM EYTEGISQRMRVPEKLVKVAEPNA 34
MFF G. gallus       -----MSGAAFPSP-AAEMAEINRLQYEM EYTEGISQRMRVPEKLVKVAEPNA 46
MFF D. rerio        -----MAEIVNRHIEYLEYTEGISQRMRIPE RLKIASGSS 34

```

```

*** : . : : * : * * * * * * * * * * * * * * * * * * * * * * * * * * * *

```

```

MFF H. sapiens      DLEQGFQEGVFNASVIMQVPERIVVAGNEDV SFSRPADLDLIQSTPFKPLALKTPPRVL 120
MFF M. musculus     DLEQEFQDGVFNASVIMQVPERIVVTGNEDIS FSRPADLDLIQSTPFKPLALKTPPRVL 94
MFF G. gallus       DLEKNIPEGFPNASVTM QVPERIVVAGN SEDIPLSRPDLDDLQSTPFKPLALKTPPRVI 106
MFF D. rerio        EEPPLGLNA--SHSTMMLVPERIV IAGDNDARFGRPRDLDIQSTPLETVELKTPPRVL 92

```

```

: : : . : . * . * * * * * * * * * * * * * * * * * * * * * * * * * * *

```

```

MFF H. sapiens      TLSERPLDFDLERLPP-TPQN-EEIRAVGRLKRERSMSEN-AVRQNGQLVRNDSLWHR 177
MFF M. musculus     TLSERPLDFDLERPLP-TPQS-EESRAVGRLKRERSMSEN-AVRQNGQLVRNDSI---- 147
MFF G. gallus       SLSDRPLDFLDLEKPPQTPQN-EEVRSVGR LKRERSMSEN-ATRQNGQLARNDMSM---- 160
MFF D. rerio        TLNDQPLDFLEPEPAANSTAQP REEMKSHFRSRREQC RSENSTMRRNGQINKHDF---- 147

```

```

: * . : * * * * * * * * * * * * * * * * * * * * * * * * * * * *

```

```

MFF H. sapiens      DSAPRNKISRFAQAPISAPEYTVTPSPQARVCP PHMLPEDGANLSSARGILSLIQSSSTR 237
MFF M. musculus     -----VTPSPQARVCP PHMLPEDGANLSSARGILSLIQSSSTR 186
MFF G. gallus       -----
MFF D. rerio        -----ASPSPSRAPVRVCPPLISPEDSQNLNSASGV LNYIKSTTR 188

```

```

MFF H. sapiens      AYQQILDVLDENRRPVLRGSSA-AATSNPHHDNVR YGISNIDTTIEGTSDDLTVVDAASL 296
MFF M. musculus     AYQQILDVLDENRRPVLRGSSA-AATSNPHHDNVR YGISNLDAAIEGASDDMTVVDAASL 245
MFF G. gallus       -----PVLRGSSAATTSNPHHDNTRYGLSNMDTTLEGT PDDMTVVDAASL 206
MFF D. rerio        AYQQVLEVLDDSQRG-----RASLVTFDASVENT PDDAGLTVDAASL 229

```

```

* . : . : * : * : * * * * * * * * * * * * * * * * * * * * * *

```

```

MFF H. sapiens      RRQIIKLNRRRLQLLEENKERAKREVMYSITVAFW LLNSWLWFR 342
MFF M. musculus     RRQIIKLNRRRLQLLEENKERAKREVMYSITVAFW LLNSWLWFR 291
MFF G. gallus       RRQIIKLNRRRLQLLEENKERAKREIMYSITVAFW LLNSWLWFR 252
MFF D. rerio        RRQIIKLNRRRLQLLEHENKERAKREVMYSLTVAFW LVNSWIWLR 275

```

```

***** : * * * * * * * * * * * * * * * * * * * * * * * * * * * *

```

### Alignment GDAP1

■ GST domains  
■ HD  
■ TMD

```

GDAP1 H. sapiens      -----MA--ERQEEQ-----RGS PPLRAEGKADAEVKLILYHWTSHSFSSQKVR LVI AE 46
GDAP1 M. musculus     -----MA--RRQDEA-----RAGVPLRVEGPPDKEVHLILYHWTSHSFSSQKVR LVI AE 46
GDAP1 G. gallus       -----MAGPGGAAPLVLVYHWTQSFSSQKVR LAI AE 31
GDAP1 D. rerio        MAVENIGEGESQDEKEILIKKDAQDSGEIVESTKTKA SKLILYHWTQSFSSQKVR LAI AE 60

```



```

GDAP1L1 G. gallus          MVLDDQIEAELEKRRKLEYQGQKCELWLCGCVFTLADILLGATLHRLKFLGLSKKYWEDGSE 295
GDAP1L1 D. rerio          MVLDDQVEAELEKRRKLEYQGQKCELWLCGPTFTLADICLGATLHRLKFLGLSRKYWEDGSR 295
*****:*****:***:*****:*****:*****:*****:*****

GDAP1L1 H. sapiens        PNLQSF FERVQRRFAFRKVLGDIHTTLLSAVINAFRLVKKRPPSEFGASFLMGSLGGMG 355
GDAP1L1 M. musculus       PNLQSF FERVQRRFAFRKVLGDIHTTLLSAVINAFRLVKKRPPSEFGASFLMGSLGGMG 358
GDAP1L1 G. gallus        PNLQSF FDRIQRRFAFRKVLGDIHTTLLSAVINAFRLVKKRPPSEFGASFLMGSLGGMG 355
GDAP1L1 D. rerio          PNLQSF FERVQKRYAFRKLVDIHTTLLSAVINAFRMVKKKPPSEFGASFLMGSLGGMG 355
*****:***:***:*****:*****:*****:*****:*****

GDAP1L1 H. sapiens        YFAYWYLKKKYI 367
GDAP1L1 M. musculus       YFAYWYLKKKYI 370
GDAP1L1 G. gallus        YFAYWYLKKKYI 367
GDAP1L1 D. rerio          YFAYWFLKKKYM 367
*****:*****:

```

## Alignment Mid49

■ Transmembrane region  
■ Disordered region  
■ Drp1 recruitment domain

```

Mid49 H. sapiens          MAEFSQKRGKRRSDEGLGSMVDFLLANARLVLGVGGAAVLGIATLAVKRFIDRATSPRDE 60
Mid49 M. musculus        MAEFSQKQRKQSGSEGLGSVDFLLANARLVLGVGGAAVLGIATLAVKRLIDRATSPPDE 60
Mid49 D. rerio           ----MYSGKRRGEDGIAAVIDFLLSNAARLVLGVGGAAVLGIATLAVKRLIERAGRPDE 56
                          *:..*:*:*:*:*:*:*:*:*:*:*:*:*:*:*:*:*:*:*:*:*:*

Mid49 H. sapiens          DD--TKGDSWKELSLLRATSPQKQPQPPA-----ALSQPVLPAPSSSAPEG 105
Mid49 M. musculus        DD--TKGDSWKELSLLRATSPQKQPQPPA-----AFSQPLATGSPSPSPVPE 105
Mid49 D. rerio           EPDKRMTDSWEELSLVSASPRLHKGIEGVMMKQIAAATKKAELSQPIE----MPSSEPO 112
                          : . ***:***: * : : : : : : : : : : : : : : : : : : : : *

Mid49 H. sapiens N       PAETDPEVTPQLSSPAPLCLTLQERLLAFERDRVTIPAAQVALAKQLAGDIALELQAYFR 165
Mid49 M. musculus        PTPIHSPTTPKFSTIAPLCLTFQERLLAFERKHVITPEAHVTLAKQLAGDIALELQAYLR 165
Mid49 D. rerio           RCDADFPFPQRKRMDLCLVTFADRLQYYRTRVCLSAEEVCVAQQRALDIATEIQAFILH 172
                          . : . *:*:*:* : * * * * * * * * * * * * * * * * * * * * * *

Mid49 H. sapiens          SKFPPELPGAFVPGGPLYDGLQAGAADHVRLVPLVLEPGLWSLVPGVDTVARDPRCWAV 225
Mid49 M. musculus        SKFPPELPGALVPGGPLYDGLQAGTAEHVRLAPLELEPGLWSLVPGVDTVAREPRCWAV 225
Mid49 D. rerio           SKHPDMLPGDMTLAGSLDDDLQVVTADHACLIVPLQLESSLWTPTAGEDTFLGHPOYCMV 232
                          **:*:*:*:* : . * * * * * * * * * * * * * * * * * * * * * * *

Mid49 H. sapiens          RRTQLEFCPRGSSPWRFLVGGYLSRVLLELLRKALASVNWPAIGSLGCLIRPSMAS 285
Mid49 M. musculus        RRTQLEFHPRGCSPPWRFLVGGYLSRVLLELLRKALSASVNWPAIGSLGCLIWPDVAS 285
Mid49 D. rerio           RRENLEYFPRGRSYWDRHLLGAYLSSRLVCEQLSKAVMESMNWPSLTGTLECEVRPVLGS 292
                          **:*:*:* * * * * * * * * * * * * * * * * * * * * * * * * * * *

Mid49 H. sapiens          EELLLLEVQHERLELT---VAVLVAVPGVDA-DDRLLLAWPLEGLAGNLWLQDLYPVEAA 340
Mid49 M. musculus        EELLLKVQHECLEFT---LAVLMVVPGAST-DDRLLLAWPLEGLASNLWLQDLYPVETA 340
Mid49 D. rerio           PELKLEIQGLTQSSHDSGERFYITVLPTRVRLGQMTLMAQREITGSFDYVWYQSLYSSETA 352
                          **:*:*:* . : : * . : * : : * . : * * * * * * * *

Mid49 H. sapiens          RLRALDDHDAGTRRRRLLLLCAVCRGCSALGQLGRGHLTQVVLRLGEDNVDTWEALGER 400
Mid49 M. musculus        RLRALDDQDAGTRRRRLLLCGICRGHPALVRLGWSHLTQVVLHLGEEVAVWTEEALGER 400
Mid49 D. rerio           RLAALDQADSGARRKCKLTKLAVCRNCPALRKLNGSHISNVVLHMSEKETDWSESAFAFSNR 412
                          ** * * * * : * * * * * * * * * * * * * * * * * * * * * * *

Mid49 H. sapiens          FLQALELLIGSLEQASLPCHFNPVSNLFLSSLRREEIDDIGYALYSGLQPEPEGLL- 454
Mid49 M. musculus        FLQALEFLVGSLEQASLPCHFNPVSNLLGNFREEEIDDIGYVLYSGLQVPESLF- 454
Mid49 D. rerio           FLQAITELIGYLETGVLPYFKANVNLFGQFTEDDIDEMGFMLYCAVTEPEIILLI 467
                          *****: * * * * * * * * * * * * * * * * * * * * * * * *

```

## Alignment Mid51

■ Transmembrane region  
■ Disordered region  
■ NT domain (N-terminus)  
■ Drp1 recruitment domain  
■ NT domain (C-terminus)

```

Mid51 H. sapiens          -MAGAGERKGGKDDNGIGTAIDFVLSNARLVLGVGGAAVLGIATLAVKRMYDRAISAPTS 59
Mid51 M. musculus        -MAGAGERKGGKDDNGIGTAIDFVLSNARLVLGVGGAAVLGIATLAVKRMYDRAISAPTS 59
Mid51 D. rerio           MAGVNGDRKGGKDDNGLGTAIDFVLSNARLVLGVGGAAVLGIATLAVKRMYDRALSAPTS 60
                          . *:*:*:*:*:*:*:*:*:*:*:*:*:*:*:*:*:*:*:*:*:*

```
